# Supplementary material
Source: PubMed Central journal article supplement (PMC3057482)
Supplement: NIHMS249423-supplement-Supplementary_Data.pdf [file NIHMS249423-supplement-Supplementary_Data.pdf]

## Supplementary methods.

### Environmental parameters

*Inorganic nutrients* — The methods for determining inorganic nutrient concentrations followed Joint Global Ocean Fluxes Study recommendations (Gordon *et al.* 1993). The concentrations of dissolved inorganic nutrients ( $\text{NH}_4^+$ ,  $\text{NO}_3^-$ ,  $\text{NO}_2^-$ ,  $\text{PO}_4^{3-}$ ) were determined in a TRAACS autoanalyzer immediately after collecting the samples and gentle filtration through 0.2  $\mu\text{m}$  filters (Acrodisc, Gelman Science).  $\text{NH}_4^+$  was detected with the indophenol blue method (pH 10.5) at 630 nm.  $\text{NO}_2^-$  was detected after diazotation with sulfanilamide and *N*-(1-naphtyl)-ethylene diammonium dichloride as the reddishpurple dye complex at 540 nm.  $\text{NO}_3^-$  was reduced in a copper cadmium coil to nitrite (with imidazole as a buffer) and then measured as nitrite. Inorganic  $\text{PO}_4^{3-}$  was determined via the molybdenum blue complex at 880 nm.

*Dissolved organic carbon (DOC)* — Samples for DOC were filtered through rinsed 0.2  $\mu\text{m}$  polycarbonate filters and sealed in precombusted (450°C for 4 h) glass ampoules after adding 50  $\mu\text{L}$  of 40% phosphoric acid. The samples were stored frozen at -20°C until analysis back in the lab. DOC concentrations of duplicate samples were determined using a Shimadzu TOC-5000 analyzer. Three-point standard curves, prepared with potassium hydrogen phthalate (Nacalai Tesque, Kyoto, Japan), were used to calculate DOC concentrations. The instrument's performance and the validity of the calibration were determined using reference material of the Hansell CRM program (44–46  $\mu\text{mol L}^{-1}$  for the reference samples;  $n = 3$  and 1–2  $\mu\text{mol L}^{-1}$  for low carbon water;  $n = 3$ ). The average analytical precision of the instrument was < 3%.

*Dissolved organic nitrogen (DON)* — Total dissolved nitrogen (TDN) was analyzed with a TRAACS 800 continuous-flow analysis system following the persulfate oxidation method. DON concentrations were calculated by subtracting the sum of the inorganic nitrogen species from

TDN concentrations. The recovery of DON was estimated on a mixture of 10 different organic compounds containing known concentrations of N (Kramer *et al.* 2005). For this reference material, the recovery efficiency of organic nitrogen was 92% of the calculated organic nitrogen concentration.

### **Bacterial-related parameters**

*Prokaryotic abundance determined by flow cytometry* — Prokaryotic plankton collected from the different depth layers of the water column were enumerated using flow cytometry. Samples (2 ml) were fixed with 1% paraformaldehyde (final concentration), shock-frozen in liquid nitrogen for 5 min and stored at -80°C (Kamiya *et al.* 2007). Picoplankton cells were stained with SYBR-Green I and enumerated with a FACSCalibur flow cytometer (Becton Dickinson) within 2 months. Immediately before analysis, the thawed picoplankton samples were stained with SYBRGreen I at room temperature in the dark for 15 min. Fluorescent microspheres (Molecular Probes) with a diameter of 1 μm were added to all samples as an internal standard. Counts were performed with an argon laser at 488 nm wavelength. Prokaryotic cells were enumerated according to their right angle scatter and green fluorescence. The counting window of the flow cytometer was set to exclude eukaryotic picoplankton.

*Prokaryotic heterotrophic production by [<sup>3</sup>H] leucine incorporation* — Bulk PHP was measured by incubating triplicate 10–40 ml samples and formaldehyde-killed blanks (2% final concentration) with 10 nM [<sup>3</sup>H]-leucine (final concentration, specific activity 160 Ci mmol<sup>-1</sup>; Amersham) in temperature-controlled incubators in the dark at *in situ* temperature for 4–10 h (Kirchman *et al.* 1985). Incubations were terminated by adding formaldehyde (2% final concentration) before filtering the samples and the blanks through 0.2 μm polycarbonate filters (25 mm filter diameter; Millipore). Subsequently, the filters were rinsed three times with 5% ice-

cold trichloroacetic acid, dried and placed in scintillation vials. Scintillation cocktail (8 ml Canberra-Packard Filter Count) was added, and after 18 h, counted in a liquid scintillation counter (LKB Wallac model 1212). The mean disintegrations per minute (DPM) of the formaldehyde-fixed blanks were subtracted from the mean DPM of the respective samples, and the resulting DPM converted into leucine incorporation rates. Prokaryotic carbon biomass production was estimated using a conservative theoretical conversion factor of  $1.55 \text{ kg C mol}^{-1} \text{ Leu}$  assuming no internal isotope dilution (Kirchman & Ducklow 1993).

*Activity of the ETS* — Electron transport system (ETS) activity was measured following the modifications of the tetrazolium reduction technique as described earlier (Aristegui & Montero 1995). Some minor modifications of the method were made to increase its sensitivity (Baltar *et al.* 2009).

*Measurements of prokaryotic extracellular enzymatic activity* — The hydrolysis of the fluorogenic substrate analogues 4-methylcoumarinyl-7-amide (MCA)-L-leucine-7-amido-4-methylcoumarin, 4-methylumbelliferyl (MUF)- $\alpha$ -D-glucoside, 4-MUF- $\beta$ -D-glucoside and MUF-phosphate was measured to estimate potential activity rates of  $\alpha$ -,  $\beta$ -glucosidase, aminopeptidase and alkaline phosphatase, respectively (Baltar *et al.* 2009; Hoppe 1983).

The environmental data used in statistical analysis can be found at: <http://icomm.mbl.edu/microbis>.

## References

Aristegui J, Montero MF (1995) The relationship between community respiration and ETS activity in the ocean. *Journal of Plankton Research* **17**, 1563-1571.

- Baltar F, Aristegui J, Gasol JM, Sintes E, Herndl GJ (2009) Evidence of prokaryotic metabolism on suspended particulate organic matter in the dark waters of the subtropical North Atlantic. *Limnology and Oceanography* **54**, 182-193.
- Gordon LI, Jennings J, Ross AA, Krest JM (1993) A suggested protocol for continuous flow automated analysis of seawater nutrients (phosphate, nitrate, nitrite and silicic acid) in the WOCE Hydrographic Program and the Joint Global Ocean Fluxes Study. In: *WOCE Operation manual, WHP Operations and Methods*, p. 52. WOCE Hydrographic Program Office.
- Hoppe H-G (1983) Significance of exoenzymatic activities in the ecology of brackish water: measurements by means of methylumbelliferyl-substrates. *Marine Ecology Progress Series* **11**, 299-308.
- Kamiya E, Izumiyama S, Nishimura M, Mitchell J, Kogure K (2007) Effects of fixation and storage on flow cytometric analysis of marine bacteria. *Journal of Oceanography* **63**, 101-112.
- Kirchman DL, Ducklow HW (1993) Estimating converting factors for thymidine and leucine methods for measuring bacterial production. In: *Handbook of methods in aquatic microbial ecology* (eds. Kemp PF, Sherr BF, Sherr EB, Cole JJ), pp. 513-517. Lewis, Boca Raton.
- Kirchman DL, K'Ness E, Hodson R (1985) Leucine incorporation and its potential as a measure of protein synthesis by bacteria in natural aquatic systems. *Applied and Environmental Microbiology* **49**, 599-607.

Kramer GD, Pausz C, Herndl GJ (2005) Elemental composition of dissolved organic matter and bacterioplankton production in the Faroe-Shetland Channel (North Atlantic). *Deep-Sea Research Part I Oceanographic Research Papers* **52**, 85-97.

**Table S1.** Description of the 45 samples from the North Atlantic Ocean selected for bacterial pyrosequencing. LDW: Lower Deep Water, NEADW: North East Atlantic Deep Water, AAIW: Antarctic Intermediate Water, tCW/SACW: transitional/South Atlantic Central Water, NIW: Northern Intermediate Water, LSW: Labrador Sea Water).

| Sample ID | Cruise       | Station | Longitude °E | Latitude °N | Depth (m) | Water mass |
|-----------|--------------|---------|--------------|-------------|-----------|------------|
| 53R       | Transat-1    | 15      | -29.13       | 58.3        | 1400      | LSW        |
| 55R       | Transat-1    | 15      | -29.13       | 58.3        | 500       | NIW        |
| 112R      | Transat-1    | 27      | -25          | 50.4        | 4000      | LDW        |
| 115R      | Transat-1    | 27      | -25          | 50.4        | 500       | NIW        |
| 137       | Transat-2    | 27      | -38.52       | 60.9        | 1700      | LSW        |
| 138       | Transat-2    | 27      | -38.52       | 60.9        | 700       | LSW        |
| S1        | Archimedes-2 | 11      | -20.21       | 11.98       | 4000      | LDW        |
| S2        | Archimedes-2 | 11      | -20.21       | 11.98       | 2750      | NEADW      |
| S3        | Archimedes-2 | 11      | -20.21       | 11.98       | 900       | AAIW       |
| S4        | Archimedes-2 | 11      | -20.21       | 11.98       | 500       | tCW        |
| S5        | Archimedes-2 | 11      | -20.21       | 11.98       | 250       | tCW        |
| S6        | Archimedes-2 | 11      | -20.21       | 11.98       | 100       | Subsurface |
| S7        | Archimedes-2 | 19      | -15.19       | 4.9         | 4500      | LDW        |
| S8        | Archimedes-2 | 19      | -15.19       | 4.9         | 4000      | LDW        |
| S9        | Archimedes-2 | 19      | -15.19       | 4.9         | 2750      | NEADW      |
| S10       | Archimedes-2 | 19      | -15.19       | 4.9         | 900       | AAIW       |
| S11       | Archimedes-2 | 19      | -15.19       | 4.9         | 500       | SACW       |
| S12       | Archimedes-2 | 19      | -15.19       | 4.9         | 250       | SACW       |
| S13       | Archimedes-2 | 19      | -15.19       | 4.9         | 100       | Subsurface |
| S14       | Archimedes-2 | 25      | -13.24       | 0.81        | 4500      | LDW        |
| S15       | Archimedes-2 | 25      | -13.24       | 0.81        | 3500      | NEADW      |
| S16       | Archimedes-2 | 25      | -13.24       | 0.81        | 3000      | NEADW      |
| S17       | Archimedes-2 | 25      | -13.24       | 0.81        | 2000      | NEADW      |
| S18       | Archimedes-2 | 25      | -13.24       | 0.81        | 1800      | NEADW      |
| S19       | Archimedes-2 | 25      | -13.24       | 0.81        | 900       | AAIW       |
| S20       | Archimedes-2 | 25      | -13.24       | 0.81        | 750       | AAIW       |
| S21       | Archimedes-2 | 25      | -13.24       | 0.81        | 500       | SACW       |
| S23       | Archimedes-2 | 25      | -13.24       | 0.81        | 100       | Subsurface |
| S24       | Archimedes-2 | 30      | -13.24       | 0.81        | 2500      | NEADW      |
| S26       | Archimedes-2 | 30      | -15.91       | -4.09       | 750       | AAIW       |
| S27       | Archimedes-2 | 30      | -15.91       | -4.09       | 500       | tCW        |
| S29       | Archimedes-2 | 30      | -15.91       | -4.09       | 100       | Subsurface |
| S30       | Archimedes-2 | 37      | -22.05       | 7.78        | 2500      | NEADW      |
| S31       | Archimedes-2 | 37      | -22.05       | 7.78        | 1800      | NEADW      |
| S32       | Archimedes-2 | 37      | -22.05       | 7.78        | 750       | AAIW       |
| S33       | Archimedes-2 | 37      | -22.05       | 7.78        | 500       | tCW        |
| S36       | Archimedes-2 | 45      | -26.0        | 16.83       | 2500      | NEADW      |
| S38       | Archimedes-2 | 45      | -26.0        | 16.83       | 900       | AAIW       |
| S39       | Archimedes-2 | 45      | -26.0        | 16.83       | 500       | tCW        |
| S40       | Archimedes-2 | 45      | -26.0        | 16.83       | 250       | tCW        |
| S41       | Archimedes-2 | 45      | -26.0        | 16.83       | 100       | Subsurface |
| S42       | Archimedes-2 | 50      | -23.11       | 21.09       | 2500      | NEADW      |
| S43       | Archimedes-2 | 50      | -23.11       | 21.09       | 1800      | NEADW      |
| S44       | Archimedes-2 | 50      | -23.11       | 21.09       | 900       | AAIW       |
| S47       | Archimedes-2 | 50      | -23.11       | 21.09       | 100       | Subsurface |

**Table S2.** Water mass properties (depth, mean and range of potential temperature and salinity) of the different water type of the North Atlantic (tCW/SACW: transitional/South Atlantic Central Water, AAIW: Antarctic Intermediate Water, NIW: Northern Intermediate Water, LSW: Labrador Sea Water, NEADW: North East Atlantic Deep water, LDW: Lower Deep Water) and number of samples (n).

| <b>Water mass</b> | <b>Depth (m)</b> | <b>Pot .Temp.* (°C)</b> | <b>Range (°C)</b> | <b>Salinity</b> | <b>Range</b>  | <b>n</b> |
|-------------------|------------------|-------------------------|-------------------|-----------------|---------------|----------|
| Subsurface        | 100 - 150        | 16.7                    | 14.2 – 20.6       | 35.97           | 35.45 – 37.06 | 6        |
| tCW/SACW          | 250 - 500        | 9.9                     | 7.4 – 13.2        | 35.05           | 34.66 – 35.62 | 9        |
| NIW               | 500 - 750        | 7.1                     | 7.0 – 7.1         | 35.09           | 35.05 – 35.12 | 2        |
| AAIW              | 750 - 900        | 5.6                     | 4.6 – 6.7         | 34.70           | 34.50 – 34.99 | 8        |
| LSW               | 1200 - 2100      | 3.3                     | 3.0 – 3.5         | 34.89           | 34.87 – 34.92 | 3        |
| NEADW             | 1750 - 4000      | 3.0                     | 2.2 – 4.0         | 34.95           | 34.90 – 35.03 | 12       |
| LDW               | 4000 - 5000      | 1.9                     | 1.5 – 2.3         | 34.88           | 34.84 – 34.92 | 5        |

\* Pot. Temp.: potential temperature

**Table S3.** ANOSIM test between water masses (tCW/SACW: transitional/South Atlantic Central Water, AAIW: Antarctic Intermediate Water, NIW: Northern Intermediate Water, LSW: Labrador Sea Water, NEADW: North East Atlantic Deep water, LDW: Lower Deep Water) based on the relative abundance of all OTUs (97%) except the singletons.

Global R = 0.597; Significance level = 0.001; Number of permutations: 999

| Pairwise tests between water masses | R-value | Significance level | Actual permutations |
|-------------------------------------|---------|--------------------|---------------------|
| Subsurface, AAIW                    | 0.444   | 0.007              | 999                 |
| Subsurface, tCW/SACW                | 0.228   | 0.034              | 999                 |
| Subsurface, NEADW                   | 0.722   | 0.002              | 999                 |
| Subsurface, LDW                     | 0.744   | 0.006              | 462                 |
| Subsurface, LSW                     | 0.772   | 0.012              | 84                  |
| Subsurface, NIW                     | 0.51    | 0.036              | 56                  |
| AAIW, tCW/SACW                      | 0.115   | 0.062 (n.s.*)      | 999                 |
| AAIW, NEADW                         | 0.428   | 0.001              | 999                 |
| AAIW, LDW                           | 0.796   | 0.002              | 999                 |
| AAIW, LSW                           | 0.874   | 0.006              | 165                 |
| AAIW, NIW                           | 0.716   | 0.022              | 45                  |
| tCW/SACW, NEADW                     | 0.759   | 0.001              | 999                 |
| tCW/SACW, LDW                       | 0.878   | 0.001              | 999                 |
| tCW/SACW, LSW                       | 0.937   | 0.005              | 220                 |
| tCW/SACW, NIW                       | 0.709   | 0.018              | 55                  |
| NEADW, LDW                          | 0.744   | 0.006              | 462                 |
| NEADW, LSW                          | 0.89    | 0.002              | 455                 |
| NEADW, NIW                          | 0.937   | 0.011              | 91                  |
| LDW, LSW                            | 0.508   | 0.036              | 56                  |
| LDW, NIW                            | 0.545   | 0.048              | 21                  |
| LSW, NIW                            | 1       | 0.1 (n.s.*)        | 10                  |

\*n.s.: non-significant



**Table S4.** Characteristics of the 100 most abundant OTUs (# of OTUs; ID, identification number; percent of contribution to the 100 most abundant OTUs; affiliation)

| # OTU | Cluster ID                 | % to the 100 first OTUs | Affiliation                                                                                              |
|-------|----------------------------|-------------------------|----------------------------------------------------------------------------------------------------------|
| 1     | Alphaproteobacteria_03_1   | 29,72                   | Bacteria;Proteobacteria;Alphaproteobacteria;Rickettsiales;SAR11                                          |
| 2     | Alphaproteobacteria_03_2   | 7,87                    | Bacteria;Proteobacteria;Alphaproteobacteria;Rickettsiales;SAR11                                          |
| 3     | ProteobacteriaNA_03_1      | 7,06                    | Bacteria;Proteobacteria                                                                                  |
| 4     | Gammaproteobacteria_03_8   | 5,85                    | Bacteria;Proteobacteria;Gammaproteobacteria                                                              |
| 5     | Alphaproteobacteria_03_21  | 3,08                    | Bacteria;Proteobacteria;Alphaproteobacteria                                                              |
| 6     | Gammaproteobacteria_03_29  | 2,93                    | Bacteria;Proteobacteria;Gammaproteobacteria                                                              |
| 7     | Gammaproteobacteria_03_47  | 2,88                    | Bacteria;Proteobacteria;Gammaproteobacteria                                                              |
| 8     | Gammaproteobacteria_03_44  | 2,69                    | Bacteria;Proteobacteria;Gammaproteobacteria                                                              |
| 9     | ProteobacteriaNA_03_6      | 1,52                    | Bacteria;Proteobacteria                                                                                  |
| 10    | Actinobacteria_03_4        | 1,54                    | Bacteria;Actinobacteria;Actinobacteria                                                                   |
| 11    | ProteobacteriaNA_03_8      | 1,52                    | Bacteria;Proteobacteria                                                                                  |
| 12    | Alphaproteobacteria_03_53  | 1,46                    | Bacteria;Proteobacteria;Alphaproteobacteria                                                              |
| 13    | Alphaproteobacteria_03_26  | 1,41                    | Bacteria;Proteobacteria;Alphaproteobacteria                                                              |
| 14    | Verrucomicrobia_03_3       | 1,33                    | Bacteria;Verrucomicrobia;Verrucomicrobiae;Verrucomicrobiales                                             |
| 15    | Gammaproteobacteria_03_52  | 1,11                    | Bacteria;Proteobacteria;Gammaproteobacteria                                                              |
| 16    | Alphaproteobacteria_03_258 | 1,03                    | Bacteria;Proteobacteria;Alphaproteobacteria;Rhizobiales                                                  |
| 17    | BacteriaNA_03_2            | 0,89                    | Bacteria                                                                                                 |
| 18    | Alphaproteobacteria_03_20  | 0,81                    | Bacteria;Proteobacteria;Alphaproteobacteria                                                              |
| 19    | Deltaproteobacteria_03_2   | 0,75                    | Bacteria;Proteobacteria;Deltaproteobacteria;Desulfobacterales;Nitrospinae;Nitrospina                     |
| 20    | Verrucomicrobia_03_6       | 0,73                    | Bacteria;Verrucomicrobia;Verrucomicrobiae;Verrucomicrobiales                                             |
| 21    | Betaproteobacteria_03_1    | 0,87                    | Bacteria;Proteobacteria;Betaproteobacteria;Burkholderiales;Burkholderiaceae;Ralstonia                    |
| 22    | Gammaproteobacteria_03_106 | 0,72                    | Bacteria;Proteobacteria;Gammaproteobacteria                                                              |
| 23    | Betaproteobacteria_03_11   | 0,74                    | Bacteria;Proteobacteria;Betaproteobacteria;Burkholderiales;Comamonadaceae;Diaphorobacter                 |
| 24    | ProteobacteriaNA_03_14     | 0,64                    | Bacteria;Proteobacteria                                                                                  |
| 25    | BacteriaNA_03_15           | 0,62                    | Bacteria                                                                                                 |
| 26    | Alphaproteobacteria_03_17  | 0,60                    | Bacteria;Proteobacteria;Alphaproteobacteria                                                              |
| 27    | Gammaproteobacteria_03_78  | 0,57                    | Bacteria;Proteobacteria;Gammaproteobacteria;Oceanospirillales                                            |
| 28    | Deferribacteres_03_6       | 0,61                    | Bacteria;Deferribacteres                                                                                 |
| 29    | ProteobacteriaNA_03_12     | 0,53                    | Bacteria;Proteobacteria                                                                                  |
| 30    | BacteriaNA_03_6            | 0,49                    | Bacteria                                                                                                 |
| 31    | Alphaproteobacteria_03_94  | 0,45                    | Bacteria;Proteobacteria;Alphaproteobacteria                                                              |
| 32    | Alphaproteobacteria_03_71  | 0,44                    | Bacteria;Proteobacteria;Alphaproteobacteria                                                              |
| 33    | Alphaproteobacteria_03_261 | 0,40                    | Bacteria;Proteobacteria;Alphaproteobacteria;Rhizobiales                                                  |
| 34    | Gammaproteobacteria_03_128 | 0,41                    | Bacteria;Proteobacteria;Gammaproteobacteria                                                              |
| 35    | Gammaproteobacteria_03_7   | 0,41                    | Bacteria;Proteobacteria;Gammaproteobacteria;Alteromonadales;Pseudoalteromonadaceae;Pseudoalteromonadales |
| 36    | Alphaproteobacteria_03_27  | 0,45                    | Bacteria;Proteobacteria;Alphaproteobacteria;Sphingomonadales;Sphingomonadaceae                           |
| 37    | Gammaproteobacteria_03_113 | 0,39                    | Bacteria;Proteobacteria;Gammaproteobacteria                                                              |
| 38    | Alphaproteobacteria_03_30  | 0,39                    | Bacteria;Proteobacteria;Alphaproteobacteria                                                              |
| 39    | BacteriaNA_03_10           | 0,39                    | Bacteria                                                                                                 |
| 40    | BacteriaNA_03_14           | 0,38                    | Bacteria                                                                                                 |
| 41    | Gammaproteobacteria_03_19  | 0,43                    | Bacteria;Proteobacteria;Gammaproteobacteria                                                              |
| 42    | Gammaproteobacteria_03_40  | 0,38                    | Bacteria;Proteobacteria;Gammaproteobacteria                                                              |
| 43    | Deferribacteres_03_10      | 0,37                    | Bacteria;Deferribacteres                                                                                 |
| 44    | BacteriaNA_03_49           | 0,36                    | Bacteria                                                                                                 |
| 45    | Alphaproteobacteria_03_116 | 0,36                    | Bacteria;Proteobacteria;Alphaproteobacteria                                                              |
| 46    | Verrucomicrobia_03_17      | 0,35                    | Bacteria;Verrucomicrobia;Verrucomicrobiae;Verrucomicrobiales;Verrucomicrobiaceae                         |
| 47    | Alphaproteobacteria_03_159 | 0,34                    | Bacteria;Proteobacteria;Alphaproteobacteria                                                              |
| 48    | Alphaproteobacteria_03_75  | 0,33                    | Bacteria;Proteobacteria;Alphaproteobacteria                                                              |
| 49    | Cyanobacteria_03_1         | 0,32                    | Bacteria;Cyanobacteria;True Cyanobacteria;Prochlorales                                                   |

|     |                            |      |                                                                                            |
|-----|----------------------------|------|--------------------------------------------------------------------------------------------|
| 50  | Gammaproteobacteria_03_130 | 0,31 | Bacteria;Proteobacteria;Gammaproteobacteria                                                |
| 51  | ProteobacteriaNA_03_7      | 0,30 | Bacteria;Proteobacteria                                                                    |
| 52  | Gammaproteobacteria_03_270 | 0,30 | Bacteria;Proteobacteria;Gammaproteobacteria                                                |
| 53  | Alphaproteobacteria_03_169 | 0,29 | Bacteria;Proteobacteria;Alphaproteobacteria                                                |
| 54  | Gammaproteobacteria_03_9   | 0,28 | Bacteria;Proteobacteria;Gammaproteobacteria;Chromatiales;Ectothiorhodospiraceae            |
| 55  | ProteobacteriaNA_03_22     | 0,28 | Bacteria;Proteobacteria                                                                    |
| 56  | Deferribacteres_03_11      | 0,27 | Bacteria;Deferribacteres                                                                   |
| 57  | Betaproteobacteria_03_3    | 0,28 | Bacteria;Proteobacteria;Betaproteobacteria;Burkholderiales;Comamonadaceae                  |
| 58  | BacteriaNA_03_18           | 0,26 | Bacteria                                                                                   |
| 59  | Verrucomicrobia_03_45      | 0,25 | Bacteria;Verrucomicrobia;Opitutae;Opitutales;Opitutaceae;Opitutus                          |
| 60  | BacteriaNA_03_4            | 0,24 | Bacteria                                                                                   |
| 61  | Alphaproteobacteria_03_79  | 0,24 | Bacteria;Proteobacteria;Alphaproteobacteria                                                |
| 62  | Alphaproteobacteria_03_52  | 0,23 | Bacteria;Proteobacteria;Alphaproteobacteria                                                |
| 63  | Verrucomicrobia_03_29      | 0,23 | Bacteria;Verrucomicrobia;Verrucomicrobiae;Verrucomicrobiales                               |
| 64  | BacteriaNA_03_41           | 0,23 | Bacteria                                                                                   |
| 65  | Alphaproteobacteria_03_18  | 0,24 | Bacteria;Proteobacteria;Alphaproteobacteria;Sphingomonadales;Sphingomonadaceae;Sphingobium |
| 66  | Gammaproteobacteria_03_206 | 0,21 | Bacteria;Proteobacteria;Gammaproteobacteria                                                |
| 67  | Gammaproteobacteria_03_25  | 0,21 | Bacteria;Proteobacteria;Gammaproteobacteria                                                |
| 68  | Alphaproteobacteria_03_14  | 0,21 | Bacteria;Proteobacteria;Alphaproteobacteria                                                |
| 69  | BacteriaNA_03_35           | 0,21 | Bacteria                                                                                   |
| 70  | Alphaproteobacteria_03_242 | 0,20 | Bacteria;Proteobacteria;Alphaproteobacteria                                                |
| 71  | Alphaproteobacteria_03_155 | 0,20 | Bacteria;Proteobacteria;Alphaproteobacteria                                                |
| 72  | ProteobacteriaNA_03_25     | 0,20 | Bacteria;Proteobacteria                                                                    |
| 73  | Gemmatimonadetes_03_3      | 0,18 | Bacteria;Gemmatimonadetes                                                                  |
| 74  | Gammaproteobacteria_03_15  | 0,19 | Bacteria;Proteobacteria;Gammaproteobacteria;Alteromonadales;Alteromonadaceae;Alteromonas   |
| 75  | Deltaproteobacteria_03_106 | 0,19 | Bacteria;Proteobacteria;Deltaproteobacteria;Desulfobacterales;Nitrospinaceae;Nitrospina    |
| 76  | Deferribacteres_03_7       | 0,19 | Bacteria;Deferribacteres                                                                   |
| 77  | Gammaproteobacteria_03_83  | 0,18 | Bacteria;Proteobacteria;Gammaproteobacteria                                                |
| 78  | Deferribacteres_03_4       | 0,18 | Bacteria;Deferribacteres                                                                   |
| 79  | Verrucomicrobia_03_28      | 0,17 | Bacteria;Verrucomicrobia;Verrucomicrobiae;Verrucomicrobiales                               |
| 80  | Betaproteobacteria_03_9    | 0,18 | Bacteria;Proteobacteria;Betaproteobacteria;Burkholderiales;Comamonadaceae                  |
| 81  | Deltaproteobacteria_03_122 | 0,17 | Bacteria;Proteobacteria;Deltaproteobacteria                                                |
| 82  | Alphaproteobacteria_03_32  | 0,17 | Bacteria;Proteobacteria;Alphaproteobacteria                                                |
| 83  | Alphaproteobacteria_03_329 | 0,17 | Bacteria;Proteobacteria;Alphaproteobacteria                                                |
| 84  | Gemmatimonadetes_03_1      | 0,17 | Bacteria;Gemmatimonadetes                                                                  |
| 85  | Gammaproteobacteria_03_46  | 0,17 | Bacteria;Proteobacteria;Gammaproteobacteria                                                |
| 86  | Actinobacteria_03_32       | 0,15 | Bacteria;Actinobacteria;Actinobacteria                                                     |
| 87  | Alphaproteobacteria_03_264 | 0,16 | Bacteria;Proteobacteria;Alphaproteobacteria                                                |
| 88  | Verrucomicrobia_03_19      | 0,16 | Bacteria;Verrucomicrobia;Opitutae;Opitutales;Opitutaceae;Opitutus                          |
| 89  | Gammaproteobacteria_03_198 | 0,14 | Bacteria;Proteobacteria;Gammaproteobacteria                                                |
| 90  | Alphaproteobacteria_03_195 | 0,15 | Bacteria;Proteobacteria;Alphaproteobacteria                                                |
| 91  | Deltaproteobacteria_03_74  | 0,15 | Bacteria;Proteobacteria;Deltaproteobacteria                                                |
| 92  | BacteriaNA_03_38           | 0,15 | Bacteria                                                                                   |
| 93  | ProteobacteriaNA_03_51     | 0,14 | Bacteria;Proteobacteria                                                                    |
| 94  | Bacteroidetes_03_18        | 0,15 | Bacteria;Bacteroidetes;Flavobacteria;Flavobacteriales                                      |
| 95  | Planctomycetes_03_6        | 0,13 | Bacteria;Planctomycetes;Planctomycetacia;Planctomycetales;Planctomycetaceae                |
| 96  | Alphaproteobacteria_03_280 | 0,12 | Bacteria;Proteobacteria;Alphaproteobacteria;Rickettsiales;SAR11                            |
| 97  | BacteriaNA_03_21           | 0,13 | Bacteria                                                                                   |
| 98  | BacteriaNA_03_75           | 0,14 | Bacteria                                                                                   |
| 99  | Actinobacteria_03_37       | 0,13 | Bacteria;Actinobacteria;Actinobacteria                                                     |
| 100 | Gammaproteobacteria_03_32  | 0,12 | Bacteria;Proteobacteria;Gammaproteobacteria                                                |

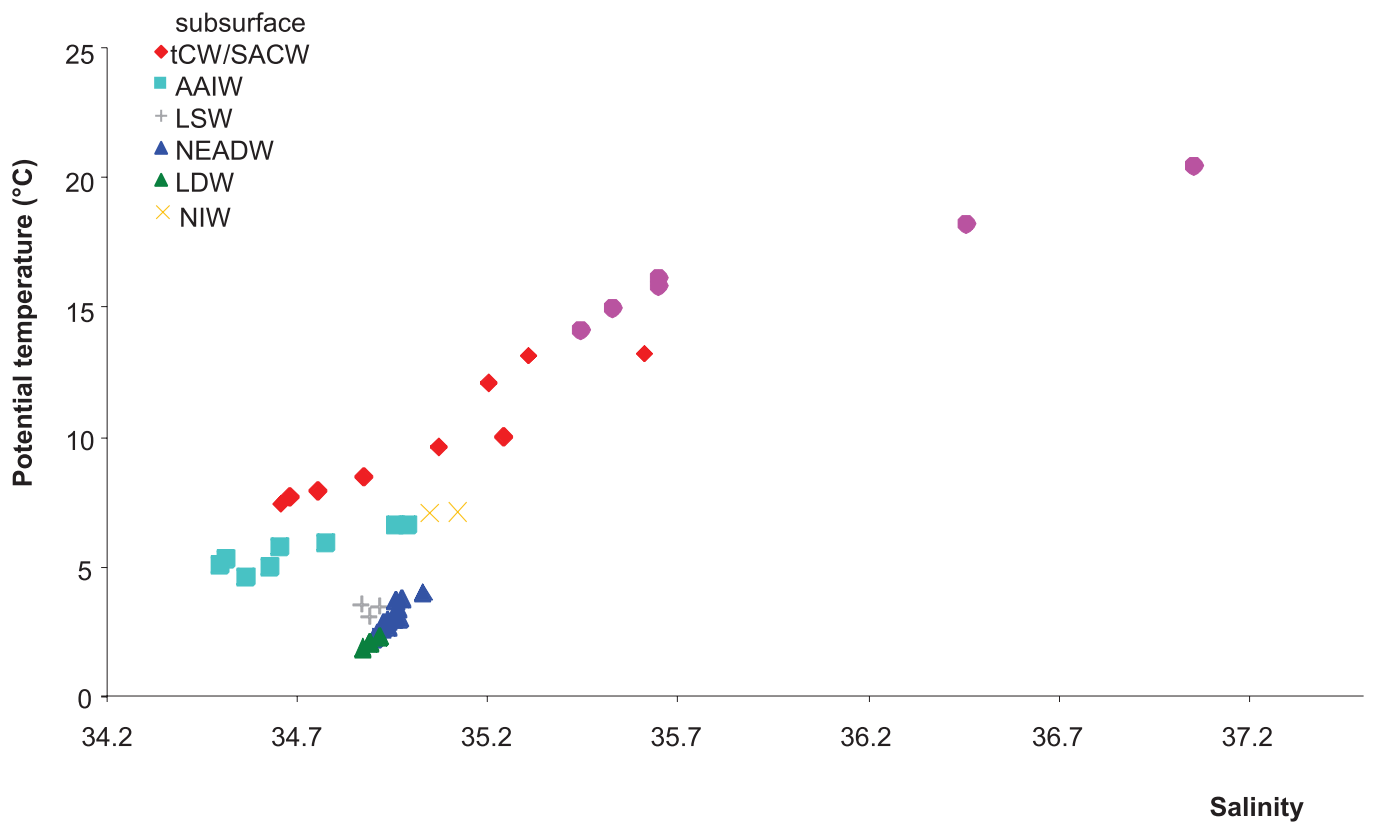

Figure S1. Temperature – salinity diagram based on all the samples. Different symbols indicate the different water masses (tCW/SACW: transitional/South Atlantic Central Water, AAIW: Antarctic Intermediate Water, LSW: Labrador Sea Water, NEADW: North East Atlantic Deep Water, LDW: Lower Deep Water).

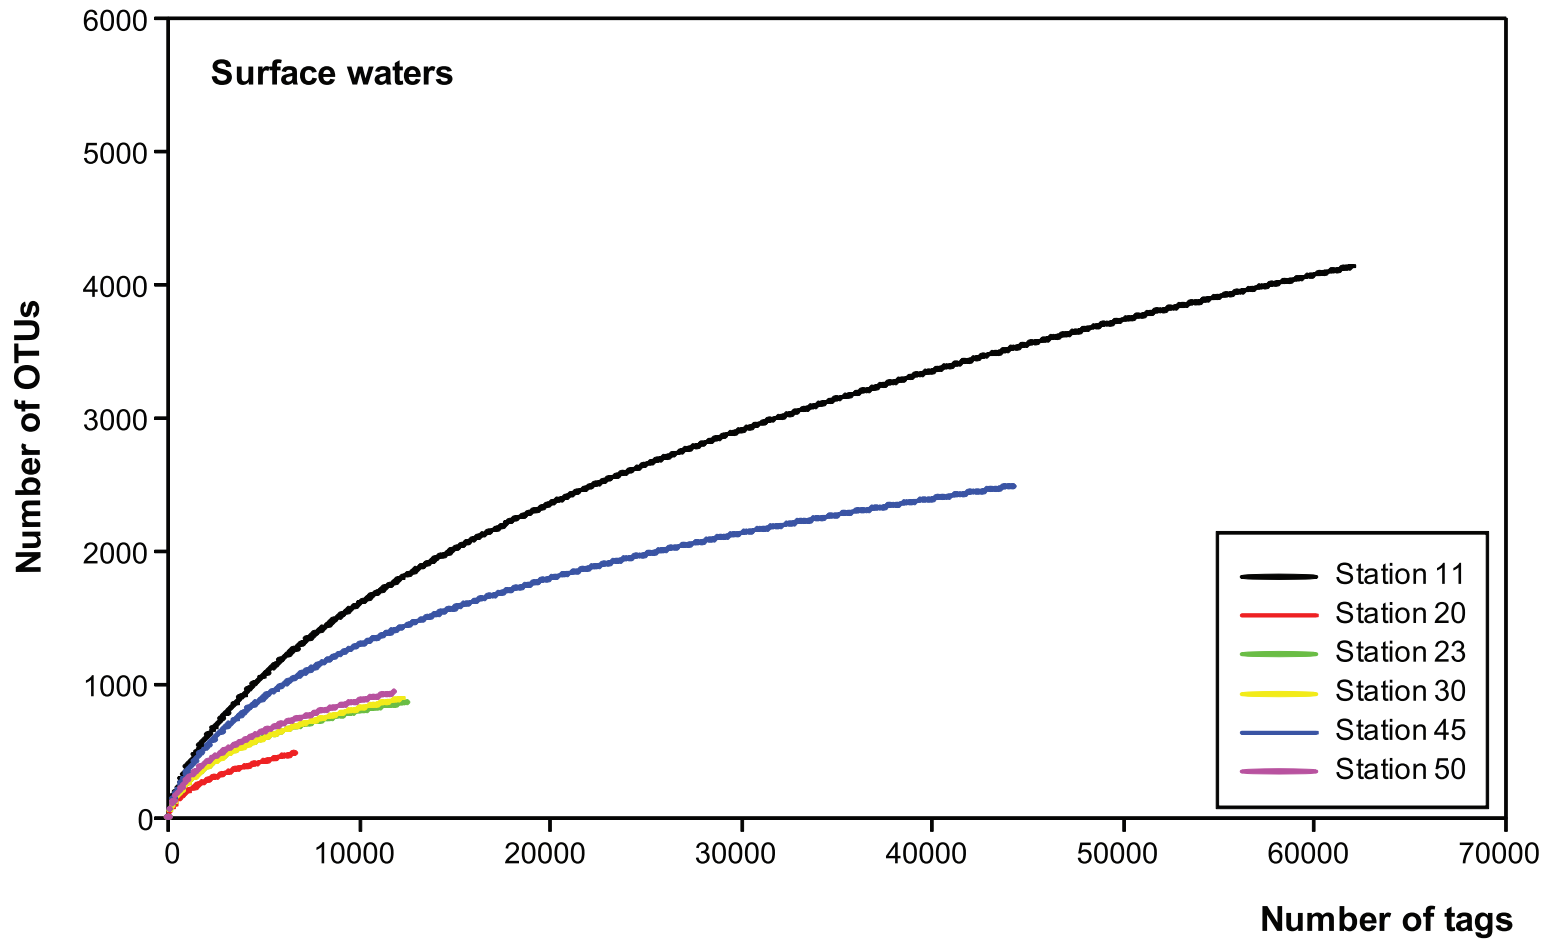

Figure S2 A. Rarefaction curves for subsurface ( $\approx 100$  m depth) samples.

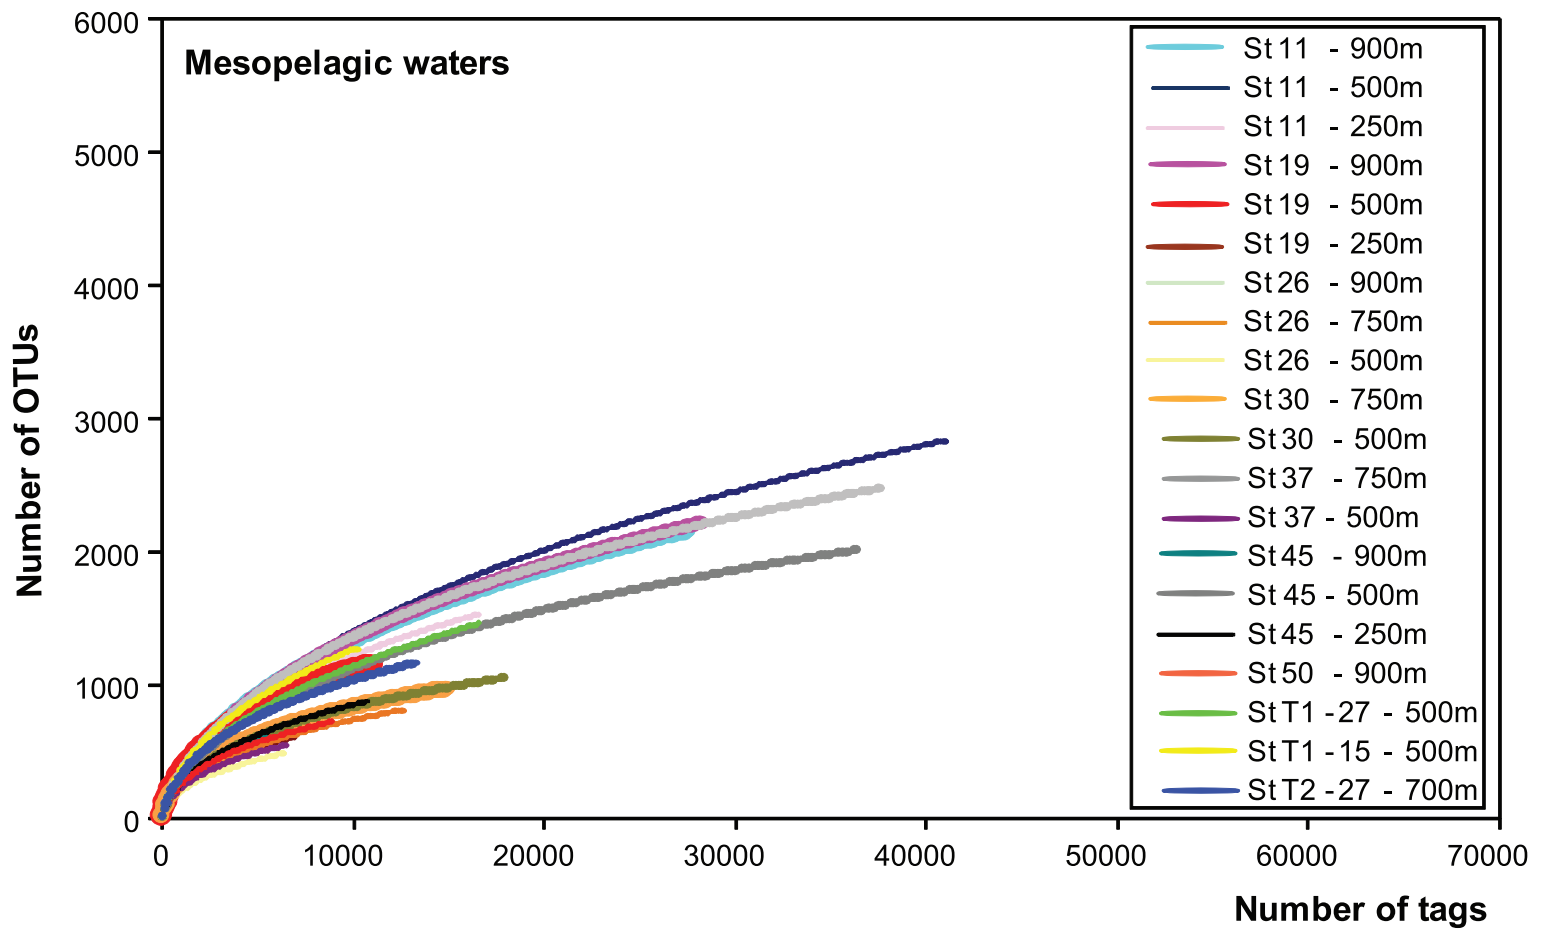

Figure S2 B. Rarefaction curves for mesopelagic samples.

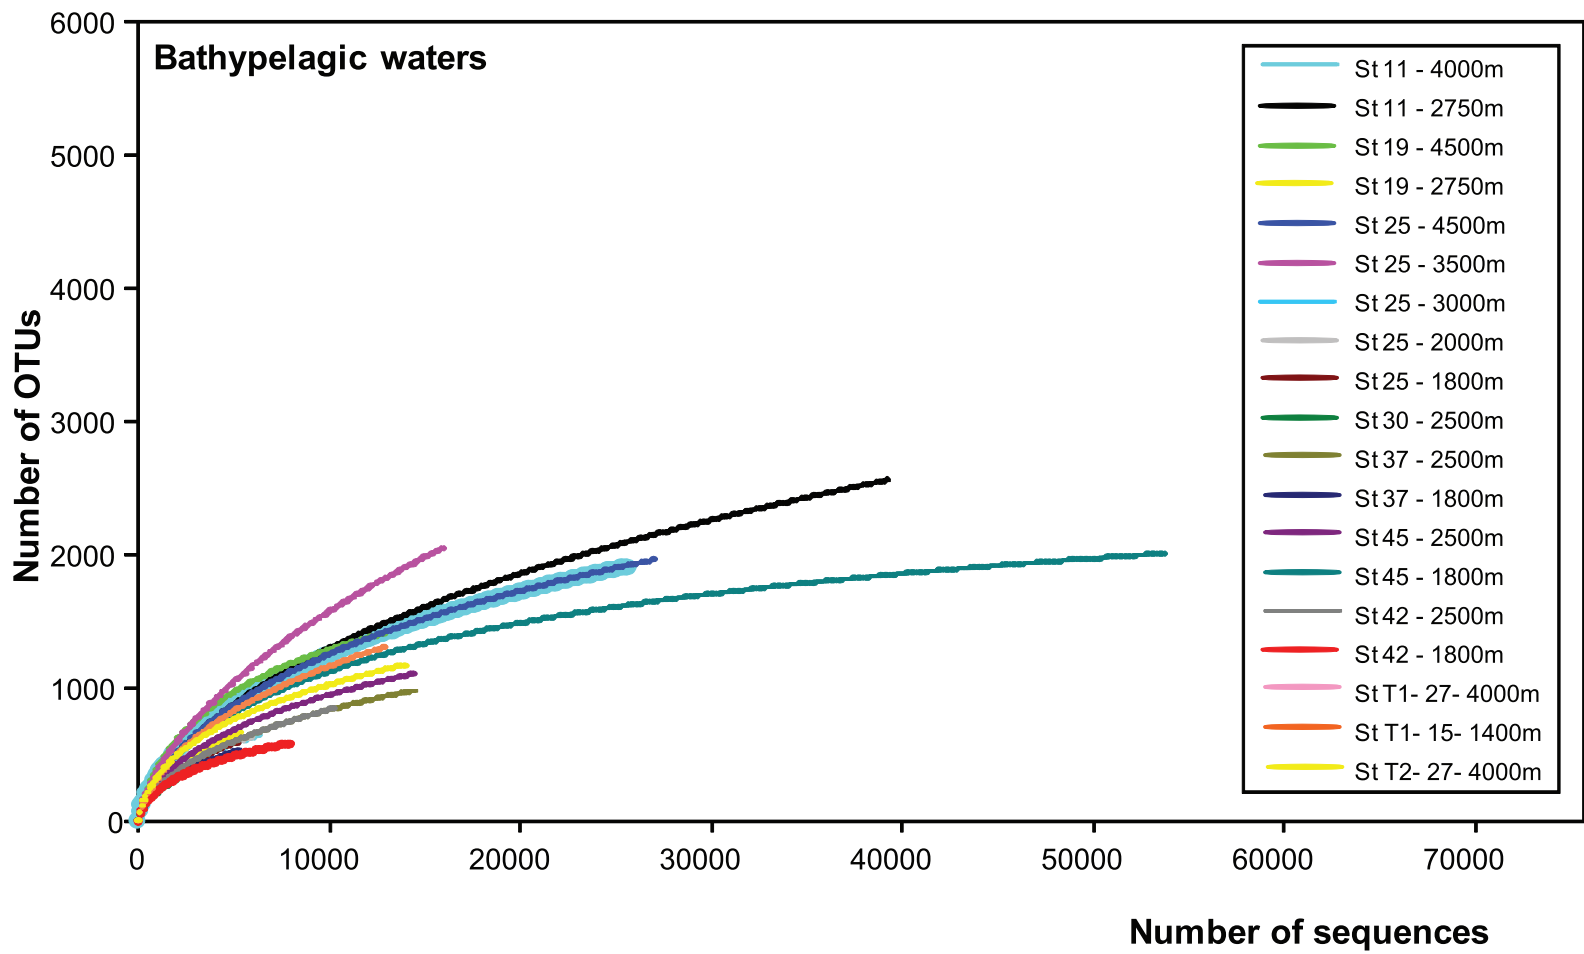

Figure S2 C. Rarefaction curves for bathypelagic samples.

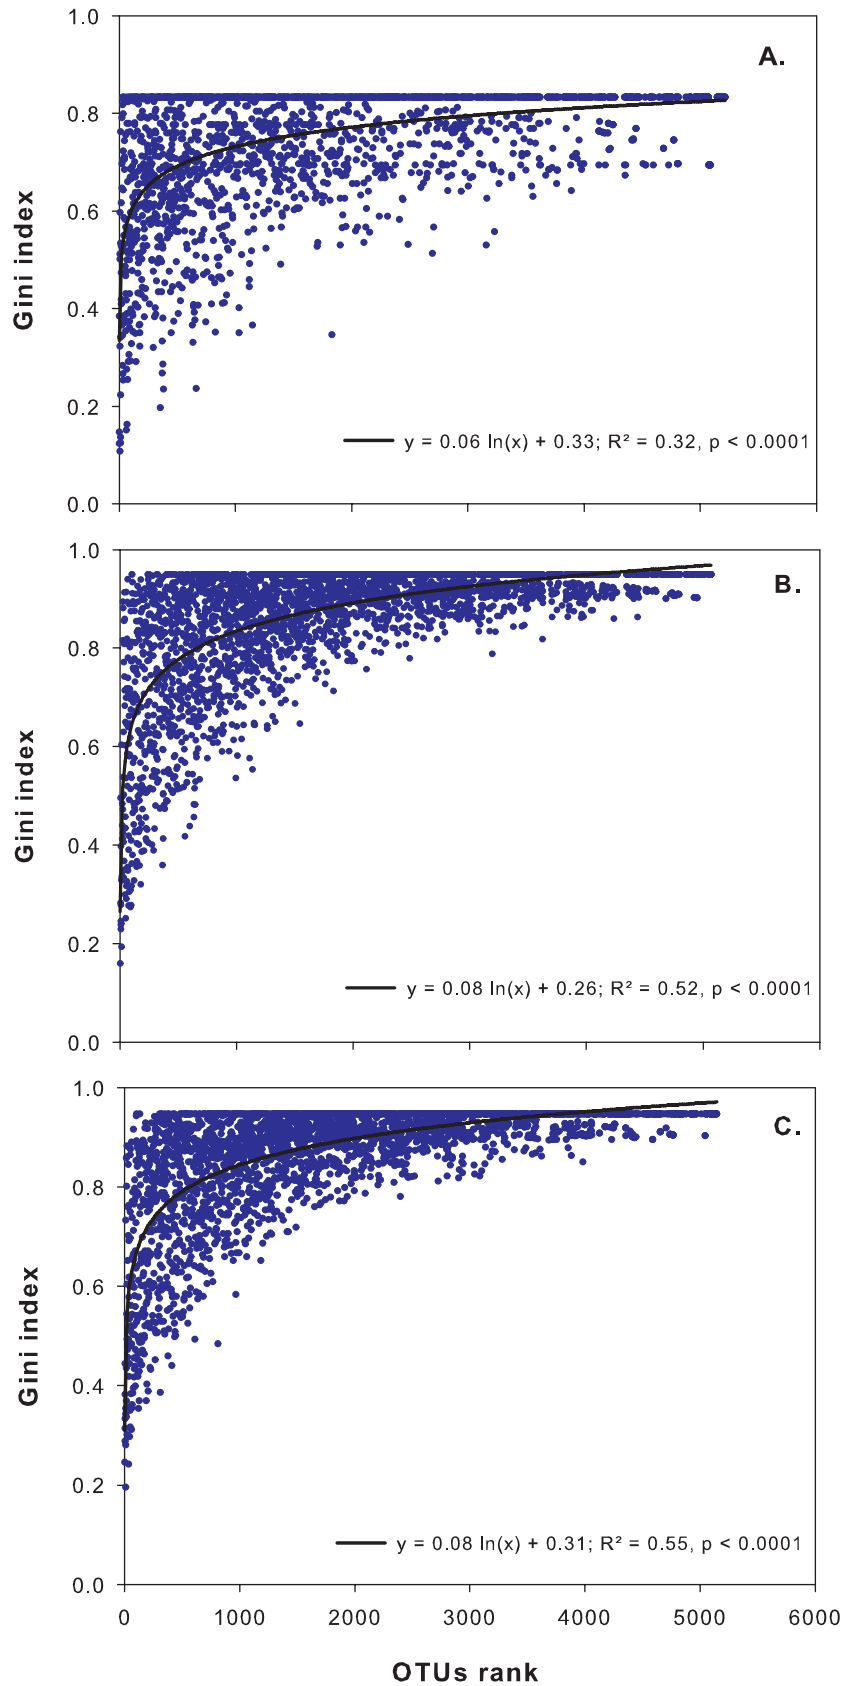

Figure S3. Evenness (Gini index) for each bacterial OTUs (97%) except the singletons from (A) subsurface, (B) mesopelagic and (C) bathypelagic samples vs. the rank (based on the relative abundance) of that OTU. A Gini index of 1 would indicate a very uneven OTU whereas a Gini index of 0 would indicate a perfectly even OTU.

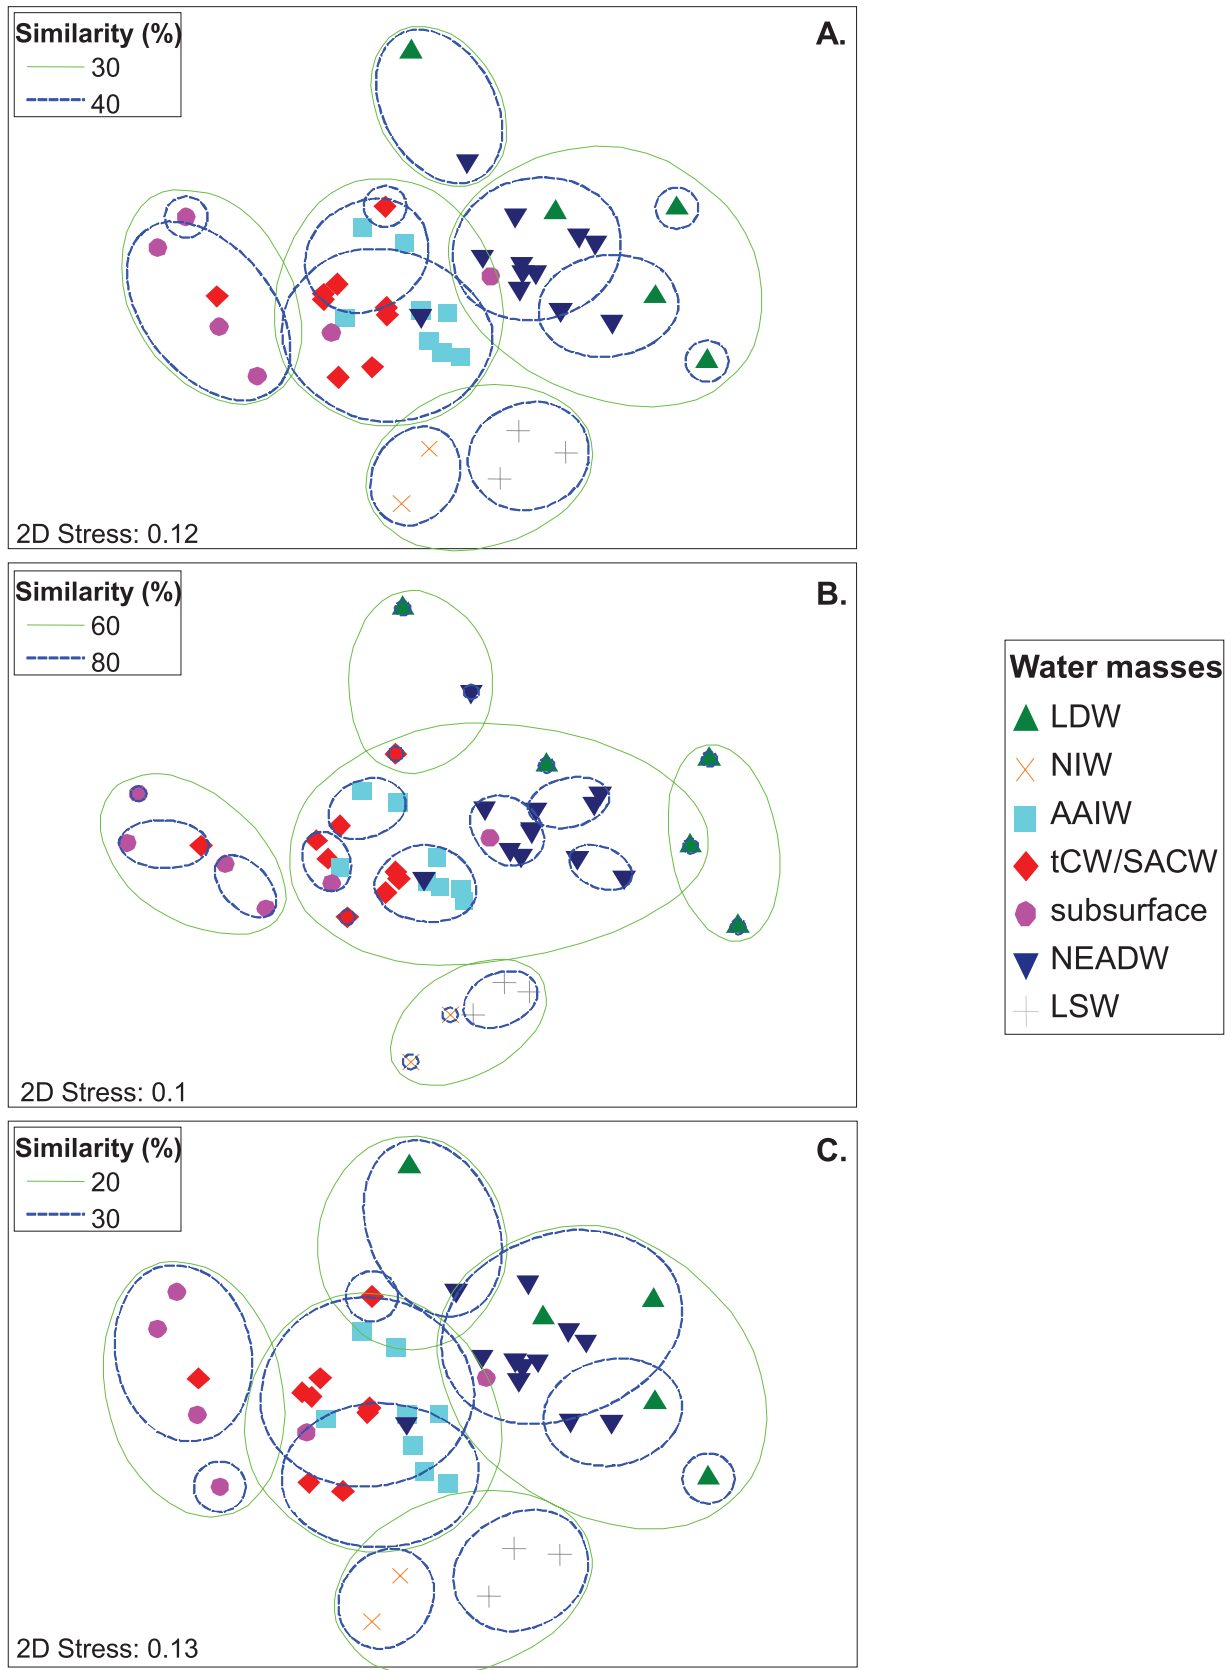

Figure S4. Non-metric multidimensional analysis based on relative abundance of (A) all pyrotags except the singletons, (B) abundant pyrotags (frequency > 1% within a sample) and (C) rare pyrotags (frequency < 0.1% within a sample). Individual samples were affiliated to their respective water-mass. Superimposed circles represent clusters of samples at similarity values of (A) 30 and 40%, (B) 60 and 80% and (C) 20 and 30% (Bray-Curtis similarity). The final solution was based on 25 iterations with a final stress of (a) 0.10 and (b) 0.13.



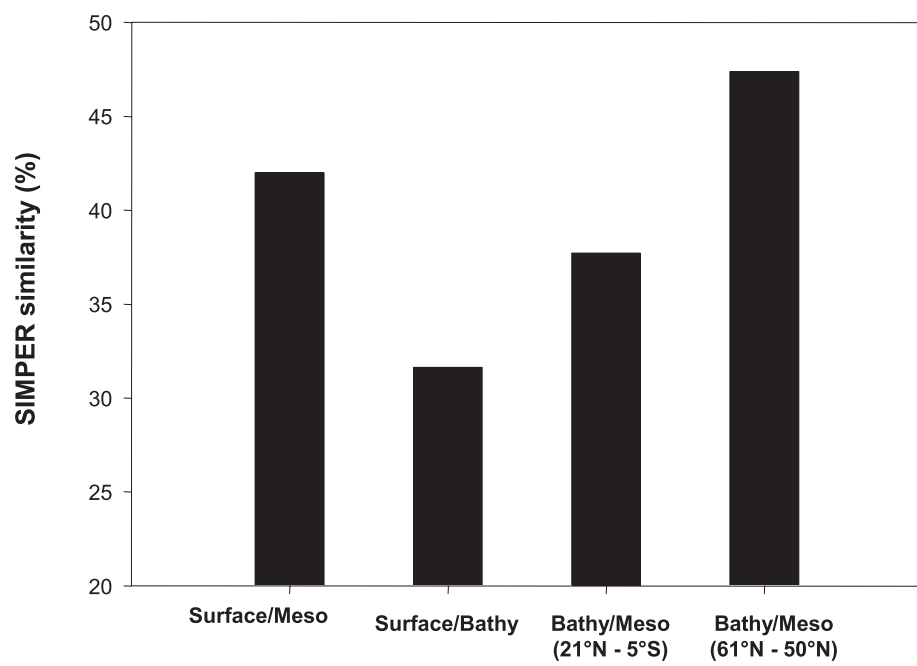

Figure S5. Percent of similarity (calculated through SIMPER analysis) between depth zones.
